# Supplementary material for: A g-C3N4/MIL-101(Fe) heterostructure composite for highly efficient BPA degradation with persulfate under visible light irradiation
Source: Royal Society of Chemistry journal article supplement (doi:10.1039/c8ta07915c), 2018-01-01
Supplement: c8ta07915c1.pdf [file c8ta07915c1.pdf]

## Supplementary Information

### **g-C<sub>3</sub>N<sub>4</sub>/MIL-101(Fe) heterostructure composite for high efficient BPA degradation with persulfate under visible light irradiation**

Yan Gong<sup>a, b, d</sup>, Bo Yang<sup>b, d</sup>, Hui Zhang<sup>c</sup>, Xu Zhao<sup>a\*</sup>

a, Key Laboratory of Drinking Water Science and Technology, Research Center for Eco-Environmental Sciences, Chinese Academy of Sciences, Beijing 100085, PR China

b, College of Chemistry and Environmental Engineering, Shenzhen University, Shenzhen 518060, PR China

c, State Key Laboratory of Environmental Chemistry and Eco-toxicology, Research Centre for Eco-Environmental Sciences, Chinese Academy of Sciences, Beijing 100085, PR China

d, Shenzhen Key Laboratory of Environmental Chemistry and Ecological Remediation, Shenzhen University, Shenzhen 518060, PR China

\*Corresponding Authors: [zhaoxu@rcees.ac.cn](mailto:zhaoxu@rcees.ac.cn) (X. Zhao)

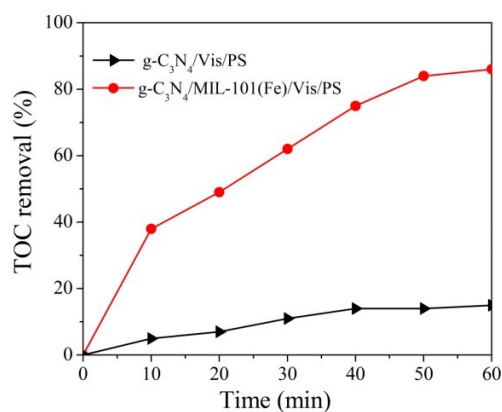

**Fig. S1** TOC removal efficiency in the BPA degradation over the g-C<sub>3</sub>N<sub>4</sub>/Vis/PS and g-C<sub>3</sub>N<sub>4</sub>/MIL-101(Fe)/Vis/PS system

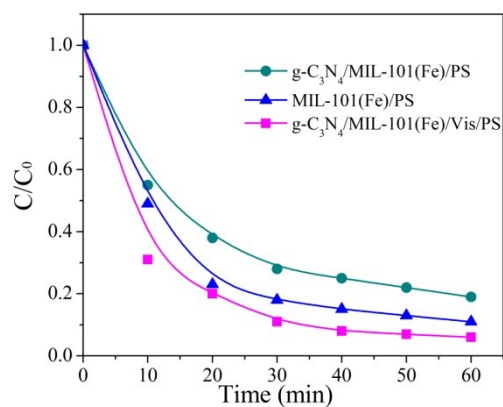

**Fig. S2** Decomposition rate of PS over different samples

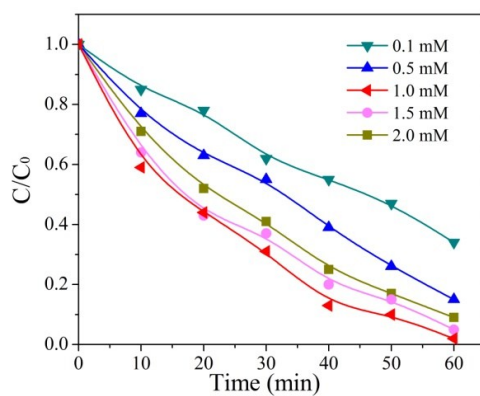

**Fig. S3** Influence of PS concentration on the degradation efficiency of BPA over g-C<sub>3</sub>N<sub>4</sub>/MIL-101(Fe) composite

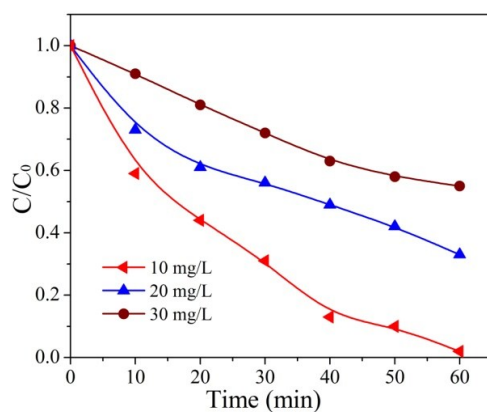

**Fig. S4** Influence of BPA concentration on the degradation efficiency of BPA over g-C<sub>3</sub>N<sub>4</sub>/MIL-101(Fe) composite

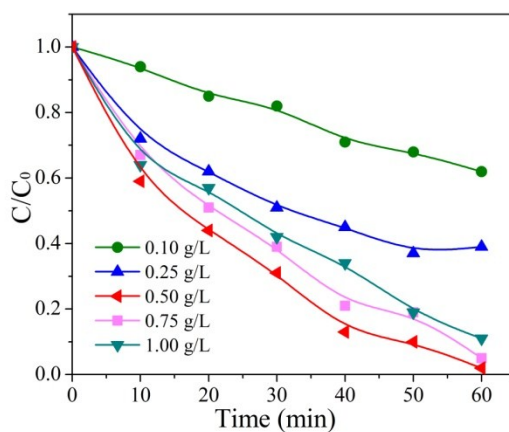

**Fig. S5** Influence of catalyst dosage on the degradation efficiency of BPA over g-C<sub>3</sub>N<sub>4</sub>/MIL-101(Fe) composite

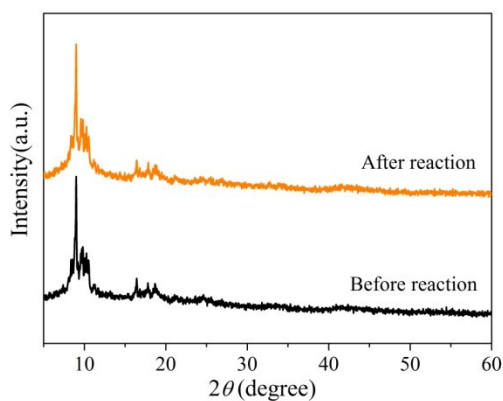

**Fig. S6** XRD patterns of g-C<sub>3</sub>N<sub>4</sub>/MIL-101(Fe) composite before and after 5 cycles reaction

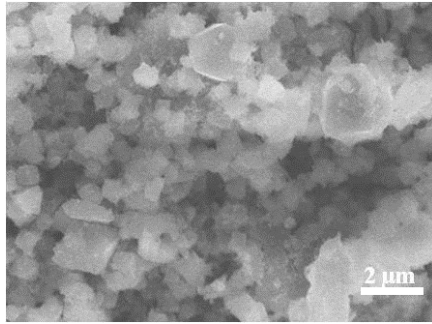

**Fig. S7** SEM image of g-C<sub>3</sub>N<sub>4</sub>/MIL-101(Fe) composite after 5 cycles reaction
